# Supplementary material for: Mixing–demixing transition in polymer-grafted spherical nanoparticles
Source: Royal Society of Chemistry journal article supplement (doi:10.1039/c9sm01639b), 2019-11-26
Supplement: c9sm01639b1.pdf [file c9sm01639b1.pdf]

SUPPLEMENTARY INFORMATION

Mixing – demixing transition in polymer-grafted spherical nanoparticles

P. Yatsyshin, N. G. Fytas, P. E. Theodorakis

Table indicates the values of  $\epsilon_{AB}$  for which phase separation occurs as a function of  $N_g$  and  $N$ .

| Fig. 2 (Upper panel, D=1) |    |                 |  | (Fig. 2 (lower panel, D= 4) |    |                 |  |
|---------------------------|----|-----------------|--|-----------------------------|----|-----------------|--|
| # Ng                      | N  | $\epsilon_{AB}$ |  | # Ng                        | N  | $\epsilon_{AB}$ |  |
| 5                         | 5  | 0.98            |  | 10                          | 5  | 0.96            |  |
| 5                         | 10 | 0.98            |  | 10                          | 10 | 0.90            |  |
| 5                         | 20 | 0.92            |  | 10                          | 20 | 0.60            |  |
| 5                         | 40 | 0.90            |  | 10                          | 40 | 0.60            |  |
| 10                        | 5  | 0.99            |  | 15                          | 5  | 0.80            |  |
| 10                        | 10 | 0.99            |  | 15                          | 10 | 0.85            |  |
| 10                        | 20 | 0.96            |  | 15                          | 20 | 0.76            |  |
| 10                        | 40 | 0.90            |  | 15                          | 40 | 0.78            |  |
| 15                        | 5  | 0.98            |  | 20                          | 5  | 0.80            |  |
| 15                        | 10 | 0.96            |  | 20                          | 10 | 0.90            |  |
| 15                        | 20 | 0.96            |  | 20                          | 20 | 0.95            |  |
| 15                        | 40 | 0.80            |  | 20                          | 40 | 0.95            |  |
|                           |    |                 |  | 25                          | 5  | 0.82            |  |
|                           |    |                 |  | 25                          | 10 | 0.90            |  |
|                           |    |                 |  | 25                          | 20 | 0.90            |  |
|                           |    |                 |  | 25                          | 40 | 0.96            |  |
|                           |    |                 |  | 30                          | 5  | 0.80            |  |
|                           |    |                 |  | 30                          | 10 | 0.95            |  |
|                           |    |                 |  | 30                          | 20 | 0.92            |  |
|                           |    |                 |  | 30                          | 40 | 0.97            |  |
|                           |    |                 |  | 35                          | 5  | 0.80            |  |
|                           |    |                 |  | 35                          | 10 | 0.84            |  |
|                           |    |                 |  | 35                          | 20 | 0.86            |  |
|                           |    |                 |  | 35                          | 40 | 0.90            |  |
|                           |    |                 |  | 40                          | 5  | 0.80            |  |
|                           |    |                 |  | 40                          | 10 | 0.84            |  |
|                           |    |                 |  | 40                          | 20 | 0.80            |  |
|                           |    |                 |  | 40                          | 40 | 0.70            |  |
